# Supplementary material
Source: ML conference proceedings conference paper supplement (https://www.ecva.net/papers/eccv_2022/papers_ECCV/html/136760402_ECCV_2022_paper.php)
Supplement: Supplementary file 2 [file 136760402-supp.zip]

Archive with 3 entries (3 files):
- 4581-supp/DeepPortraitDelightingSupplementary.pdf
- 4581-supp/DeepPortraitDelightingVideo.mp4
- 4581-supp/flickr_sources.txt
