# Supplementary material
Source: ML conference proceedings conference paper supplement (https://www.ecva.net/papers/eccv_2022/papers_ECCV/html/136760402_ECCV_2022_paper.php)
Supplement: Supplementary file 2 [file 136760402-supp.zip › 4581-supp/flickr_sources.txt]

Fig. 4 (c): 
    name: 
    licence:CC BY-SA 2.0  
    link: https://www.flickr.com/photos/debarshiray/50775661003/in/photolist-2kmSx26-5euwYL-BYxY5N-5aMy1z-5aLs3b-53pE8d-4U34kL-bVLGE8-wsxosQ-jZJ9Rk-5aMy9z-6U7kZi-wQk8en-2iSFYVi-RhwPb-dTMq9M-ciGSLU-2iJdne8-4ybH3-bDpbDA-5RXS1y-5LDktB-2majfzz-96d68T-7hpJMf-puTXxT-Goshv9-7U1pPA-2j8J9Rz-eKDCex-dFgEeT-aeuXPu-8Javwv-etFY6R-63CvA7-2kn7Ej9-4pWdpt-p3wTwz-tzjuGW-2j8FkWZ-dSwHfR-MMjgEA-HUjtmD-orEusb-9KCVXw-faaZWF-2iQdjbR-2iM68gr-9m5C5N-5hUp5p
Fig. 4 (b): 
    name:Nat Jones 
    licence:CC BY-SA 2.0  
    link:https://www.flickr.com/photos/53936799@N05/5882020795/
Fig. 7 (c): 
    name:DSC_7247 Justina Mutale Foundation United Nations CSW61 Event Woman and Girls in a Changing World of Work at the Hospital Club London Portrait with Johanna Maimela  
    licence:CC BY 2.0
    link:https://www.flickr.com/photos/41087279@N00/33541878380/in/photolist-T6YTRW-27duW2S-26tTdz3-raN3J9-r7jRq5-pfanBx-sodRv5-JGFaLz-27kscps-tSuNhm-ZWjwJq-roE3TF-wDy7Kn-vewzY3-wUNQxG-M36AR8-2bnGXDX-rNnYao-27fBs8q-TzPn9g-sQMJ7d-wKaopu-24HFh4b-wGczT2-UN9Q1o-Qyf1zs-K2dqqr-9QcQnb-UUFJxK-22phSDK-275qC4k-rV2qvw-CGVair-BYUo4o-wuMQvK-GTMdNs-zT7GgK-DBScK9-JatVc8-EhGoen-2fDMRqs-26uTuZj-245PXs8-YzwJFm-QFdusT-JXkKUp-DXPx3k-Cq8uph-MiDbaG-Lm4zZr
Fig. 7 (b): 
    name: 
    licence:CC BY-SA 2.0
    link:https://www.flickr.com/photos/debarshiray/31746084701/in/photolist-QnhYXX-Sfc8GA-2dQgpKG-S3RvXo-CkGuGv-y3SFGi-zwLrJw-YpxCfo-2a2gAv6-2emmNcc-2eRApph-MEff2t-2dHAkeQ-2dN781g-28kVmab-rvWp3s-FZhhFg-272swaK-25FxkDN-GoHyJC-2ffYy5w-xueYKk-PgiPYo-2c8shgq-2bQJtav-E1XhLD-Qc7fZw-R6LEeW-sBVMvP-2aiXwtm-2a1YQn8-DomNtv-2a5ijg5-2a18r97-24hxo9B-RfeZBJ-25GrxTe-QqpTiK-Q3nwct-2c8uoTj-2ajfDiE-2dPViEJ-2a18qt9-RfeZkm-PXhpqQ-S3Rxj1-2dafDqm-QUbYuY-LHV9Dm-28Ep6aW
